# Supplementary material
Source: PubMed Central journal article supplement (PMC11028677)
Supplement: 262_2013_1397_MOESM1_ESM.pdf [file 262_2013_1397_MOESM1_ESM.pdf]

| PATIENT CODE | SEX-AGE | STAGE | ARM | PATIENT CODE | SEX-AGE | STAGE | ARM |
|--------------|---------|-------|-----|--------------|---------|-------|-----|
| INT01/001    | F61     | IIIB  | VAX | INT01/023    | M52     | IIIB  | OBS |
| INT01/002    | F64     | IIIB  | OBS | INT01/024    | F56     | IIIA  | VAX |
| INT01/003    | M57     | IIC   | VAX | INT01/025    | M30     | IIB   | OBS |
| INT01/004    | M68     | IIB   | VAX | INT01/026    | F36     | IIIB  | OBS |
| INT01/005    | F69     | IIIA  | VAX | INT01/027    | F41     | IIIB  | OBS |
| INT01/006    | M49     | IIIB  | VAX | INT01/028    | F38     | IIIB  | VAX |
| INT01/007    | F28     | IIIB  | VAX | INT01/029    | M43     | IIIA  | OBS |
| INT01/008    | M67     | IIB   | VAX | INT01/030    | F45     | IIB   | VAX |
| INT01/009    | M44     | IIIB  | VAX | INT01/031    | F46     | IIIA  | VAX |
| INT01/010    | M55     | IIB   | OBS | INT01/032    | F55     | IIB   | OBS |
| INT01/011    | F38     | IIIB  | VAX | INT01/033    | F48     | IIIB  | VAX |
| INT01/012    | M77     | IIB   | OBS | INT01/034    | F63     | IIB   | VAX |
| INT01/013    | M68     | IIB   | VAX | INT01/035    | M68     | IIB   | OBS |
| INT01/014    | M58     | IIC   | OBS | INT01/036    | F36     | IIIB  | OBS |
| INT01/015    | F40     | IIB   | OBS | INT01/037    | M38     | IIIB  | OBS |
| INT01/016    | F56     | IIB   | OBS | SIE01/001    | M43     | IIIC  | OBS |
| INT01/017    | F49     | IIIC  | OBS | SIE01/002    | F51     | IIIA  | OBS |
| INT01/018    | M51     | IIIA  | OBS | SIE01/003    | F71     | IIIC  | VAX |
| INT01/019    | F54     | IIIB  | OBS | SIE01/004    | F56     | IIIA  | VAX |
| INT01/020    | M60     | IIB   | VAX | PDA01/001    | M66     | IIB   | VAX |
| INT01/021    | M56     | IIIC  | VAX | PDA01/002    | M46     | IIB   | VAX |
| INT01/022    | M41     | IIIB  | OBS |              |         |       |     |

 PBMC of patients available for Treg analysis

**Online table 1. Patients Characteristics**

|              | <b>Foxp3 EXPRESSION</b> |           |            |
|--------------|-------------------------|-----------|------------|
| <b>SCORE</b> | <b>I</b>                | <b>II</b> | <b>III</b> |
| <b>CRL</b>   | <b>0</b>                | <b>4</b>  | <b>5</b>   |
| <b>VAX</b>   | <b>2</b>                | <b>6</b>  | <b>1</b>   |

**Online table 2. Foxp3 expression in LN tissues**

Immunohistochemistry IHC was performed on paraffin embedded LN tissues using anti-Foxp3 mAb. Anti-Foxp3 Ab immunoreactivity was scored as grade I (0%-5%), II (5%-10%) and III (> 10%) according to the number of Foxp3 positive nuclei found in lymphocyte T area; number of positive cases for control patients (CRL, n=9) and vaccinated patients (VAX, n=9) are reported.

Vaccination arm

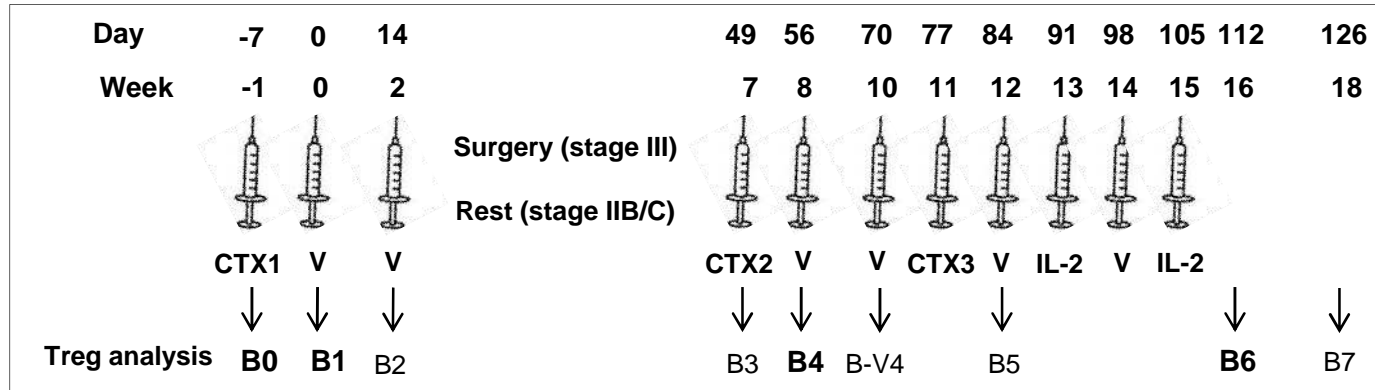

Control arm

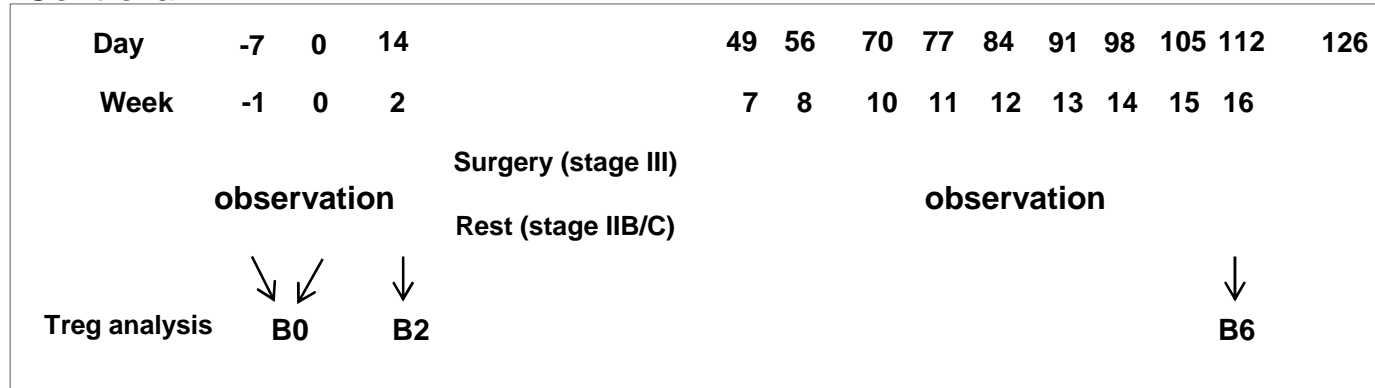

**Schematic representation of the vaccination schedule** Vaccination arm: V= peptide vaccine comprised of HLA-A\*0201-restricted (Melan-A/MART-1[27L], gp100[210M], NY-ESO-1[165V], and Survivin[97M]) 250 µg each emulsified in Montanide ISA-51. CTX= Cyclophosphamide i.v. 300 mg/m<sup>2</sup>. IL-2 s.c. 3x10<sup>6</sup> IU/day for 3 days. B= blood samples collected; bold font: samples available for all the patients. Control arm: observation only.

Online figure 1

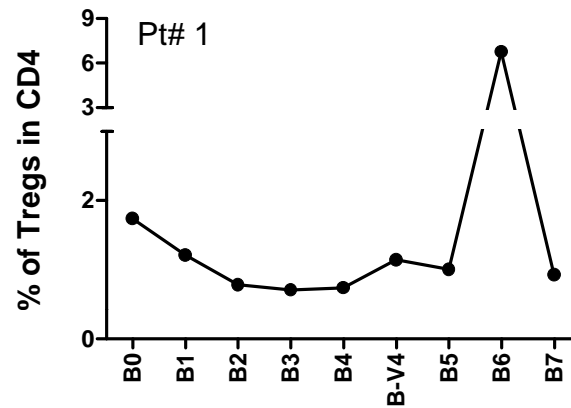

**IL-2-mediated Treg increases are transient** Graph shows the frequency profile of CD4<sup>+</sup>CD25<sup>hi</sup>Foxp3<sup>+</sup> Tregs in gated CD4<sup>+</sup> lymphocytes in patient PBMC. A representative case is reported (Pt# 1).

**Online figure 2**

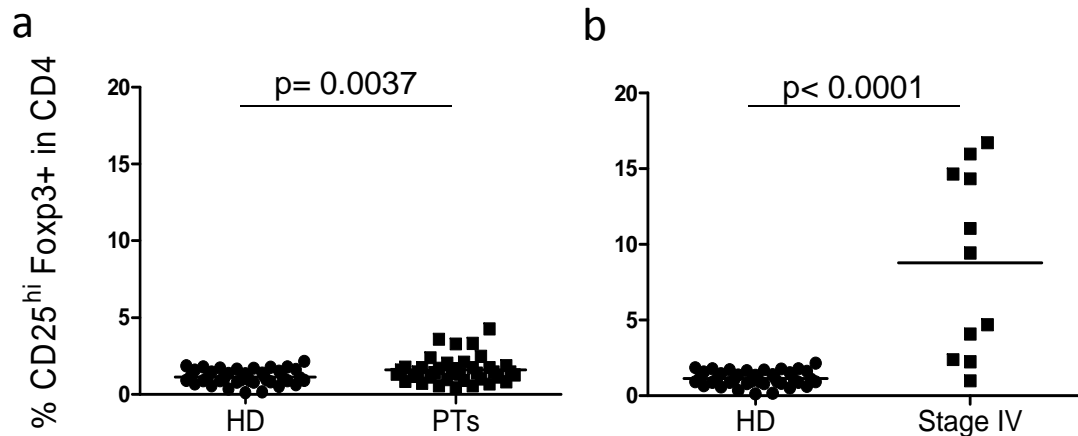

**Treg frequency in melanoma patients** Difference in the frequencies of Tregs, CD25<sup>hi</sup>Foxp3<sup>+</sup> cells in CD4 lymphocytes, between healthy donors (HD, n= 42) and patients enrolled in the study (PTs, n= 32) is reported in panel (a). Panel (b) shows the frequency of Tregs in stage IV melanoma patients with high tumor burden (Stage IV, n= 11) compared to that in healthy donors (HD) (p value calculated with Student's t-Test).

**Online figure 3**
